# Supplementary material for: Digital microfluidics for time-resolved cytotoxicity studies on single non-adherent yeast cells
Source: Royal Society of Chemistry journal article supplement (doi:10.1039/c4lc01469c), 2015-01-01
Supplement: c4lc01469c1.pdf [file c4lc01469c1.pdf]

**Electronic Supplementary Information for:**

## **Digital microfluidics for time-resolved cytotoxicity studies on single non-adherent yeast cells†**

P.T. Kumar,<sup>a,§,†</sup> K. Vriens,<sup>b,§</sup> M. Cornaglia,<sup>c</sup> M. Gijs,<sup>c</sup> T. Kokalj,<sup>a,d</sup> K. Thevissen,<sup>b</sup> A. Geeraerd,<sup>a</sup> B.P.A. Cammue,<sup>b,e,#</sup> R. Puers,<sup>f</sup> and J. Lammertyn<sup>a,#</sup>

<sup>a</sup> BIOSYST-MEBIOS, KU Leuven, Leuven, Belgium

<sup>b</sup> Centre of Microbial and Plant Genetics, KU Leuven, Leuven, Belgium

<sup>c</sup> Laboratory of Microsystems, Ecole Polytechnique Fédérale de Lausanne, CH-1015 Lausanne, Switzerland

<sup>d</sup> Institute of Metals and Technology, Ljubljana, Slovenia

<sup>e</sup> Department of Plant Systems Biology, VIB, Ghent, Belgium

<sup>f</sup> MICAS-ESAT, KU Leuven, Leuven, Belgium

<sup>§</sup> Both authors contributed equally to this work

<sup>#</sup> Authors to whom correspondence should be addressed:

Mailing address: BIOSYST-MEBIOS, KU Leuven, Willem de Croylaan 42, Heverlee, Belgium.

Phone: +3216321459. Fax: +3216322955. E-mail: [jeroen.lammertyn@biw.kuleuven.be](mailto:jeroen.lammertyn@biw.kuleuven.be)

Mailing address: CMPG, Kasteelpark Arenberg 20, box 2460, 3001 Heverlee, Belgium. Phone:

+32-16329682. Fax: +32-16321966. E-Mail: [bruno.cammue@biw.vib-kuleuven.be](mailto:bruno.cammue@biw.vib-kuleuven.be)

† In loving memory of my brother Jairaj

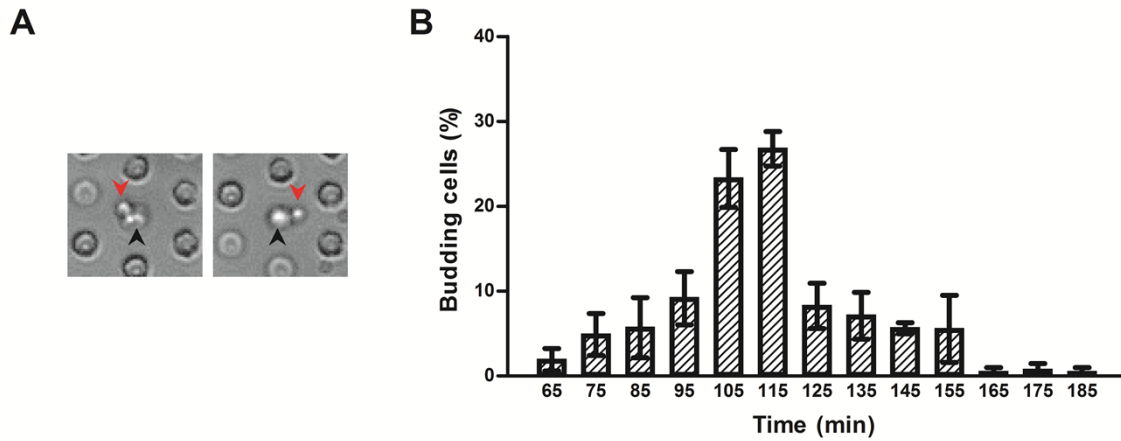

**Figure S1** Analysis of the reproduction ability of trapped yeast cells. Yeast cells were monitored for budding events during 180 min with 10 min intervals using bright-field microscopy. (A) Images of budding yeast cells taken at 180 min of incubation in 1/5 YEPD at 40X magnification. Black arrows indicate mother cells trapped inside the microwells; red arrows indicate daughter cells on top of the trapped mother cells; (B) Representation of the number of budding cells, monitored during 180 min. Means and SEMs are plotted (n=4 independent biological repetitions; in each repetition, at least 30 cells were monitored).
